# Supplementary material for: Enzymatic Formation of Protectin Dx and Its Production by Whole-Cell Reaction Using Recombinant Lipoxygenases
Source: MDPI journal article supplement (doi:10.3390/catal12101145), 2022-09-30
Supplement: s1 [file s1]

## **Supplementary data**

### **Protectin Dx Production from Docosahexanoic Acid (DHA)-Enriched Fish Oil via 10-Hydroxydocosahexaenoic Acid using Recombinant Cells Expressing Lipoxygenases**

Kyung-Chul Shin <sup>1</sup>, Tae-Eui Lee <sup>2</sup>, Su-Eun Kim <sup>2</sup>, Yoon-Joo Ko <sup>3</sup>, Min-Ju Seo <sup>4,\*</sup>, and Deok-Kun Oh <sup>1,2,\*</sup>

<sup>1</sup> Department of Integrative Bioscience and Biotechnology, Konkuk University, Seoul 05029, Republic of Korea

<sup>2</sup> Department of Bioscience and Biotechnology, Konkuk University, Seoul 05029, Republic of Korea

<sup>3</sup> National Center for Inter-University Research Facilities (NCIRF), Seoul National University, Seoul 08826, Republic of Korea

<sup>4</sup> School of Biological Sciences and Technology, Chonnam National University, Gwangju 61186, Republic of Korea.

\* Correspondence: mjseo0207@jnu.ac.kr (M.-J.S.); deokkun@konkuk.ac.kr (D.-K.O.)

**Table S1.** The chemical structures and abbreviations of SPMs and their analogs.

| Abbreviation           | Full name                                                            | Structure                                                                             |
|------------------------|----------------------------------------------------------------------|---------------------------------------------------------------------------------------|
| DHA                    | Docosahexaenoic acid                                                 | 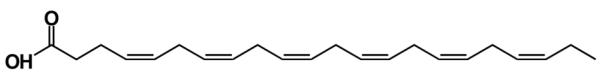   |
| AA                     | Arachidonic acid                                                     |    |
| EPA                    | Eicosapentaenoic acid                                                |    |
| 10S-HDHA               | 10S-Hydroxydocosahexaenoic acid                                      |    |
| 8S-HETE                | 8S-Hydroxyeicosatetraenoic acid                                      |    |
| 8S-HEPE                | 8S-Hydroxyeicosapentaenoic acid                                      |   |
| 10R,17S-DiDHA (or PD1) | 10R,17S-Dihydroxydocosahexaenoic acid (or Protectin D <sub>1</sub> ) |  |
| 10S,17S-DiDHA (or PDX) | 10S,17S-Dihydroxydocosahexaenoic acid (or Protectin Dx)              |  |

|                                           |                                                                         |                                                                                     |
|-------------------------------------------|-------------------------------------------------------------------------|-------------------------------------------------------------------------------------|
| 8 <i>S</i> ,15 <i>S</i> -DiHETE           | 8 <i>S</i> ,15 <i>S</i> -Dihydroxyeicosatetraenoic acid                 | 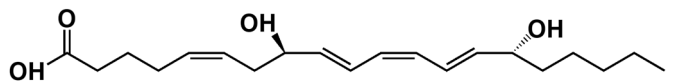 |
| 8 <i>S</i> ,15 <i>S</i> -DiHEPE           | 8 <i>S</i> ,15 <i>S</i> -Dihydroxyeicosapentaenoic acid                 |  |
| 17 <i>S</i> -HDHA                         | 17 <i>S</i> -Hydroxydocosahexaenoic acid                                |  |
| 15 <i>S</i> -HETE                         | 15 <i>S</i> -Hydroxyeicosatetraenoic acid                               |  |
| 15 <i>S</i> -HEPE                         | 15 <i>S</i> -Hydroxyeicosapentaenoic acid                               |  |
| 7 <i>S</i> ,17 <i>S</i> -DiHDHA (or RvD5) | 7 <i>S</i> ,17 <i>S</i> -Dihydroxydocosahexaenoic acid (or Resolvin D5) |  |
| 7 <i>S</i> ,14 <i>S</i> -DiHDHA           | 7 <i>S</i> ,14 <i>S</i> -Dihydroxydocosahexaenoic acid                  |  |

---

(a)

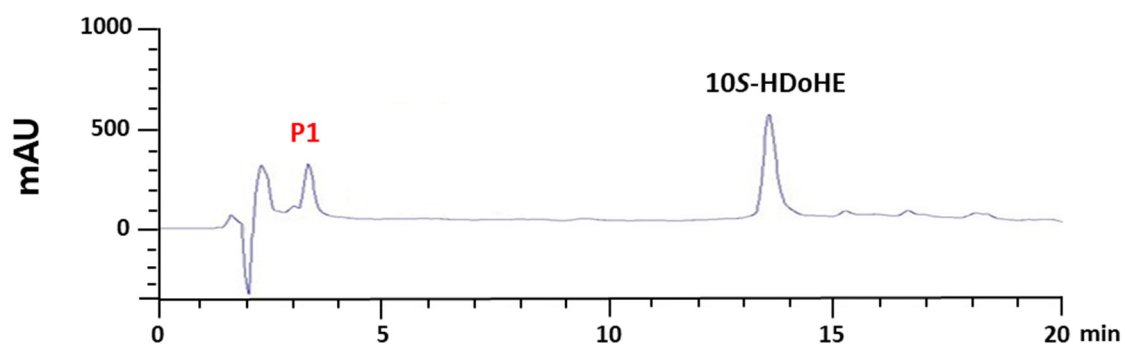

(b)

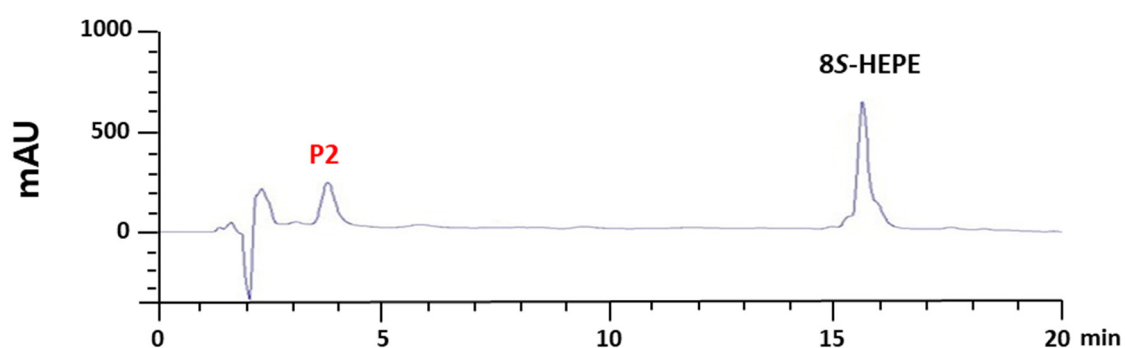

(c)

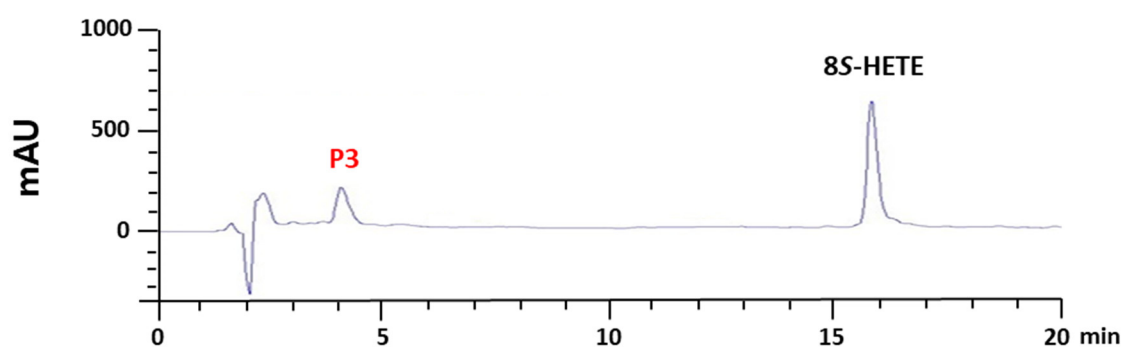

**Figure S1.** HPLC chromatograms for the products obtained from the conversion of (a) 10S-HDHA, (b) 8S-HETE, and (c) 8S-HEPE by BT 15SLOX. P1, P2, and P3 represent unknown products derived from 10S-HDHA, 8S-HETE, and 8S-HEPE, respectively.

(a)

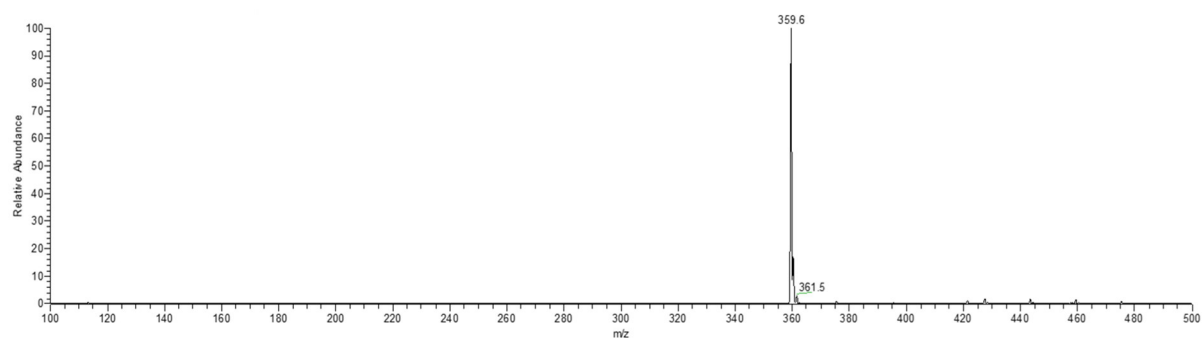

(b)

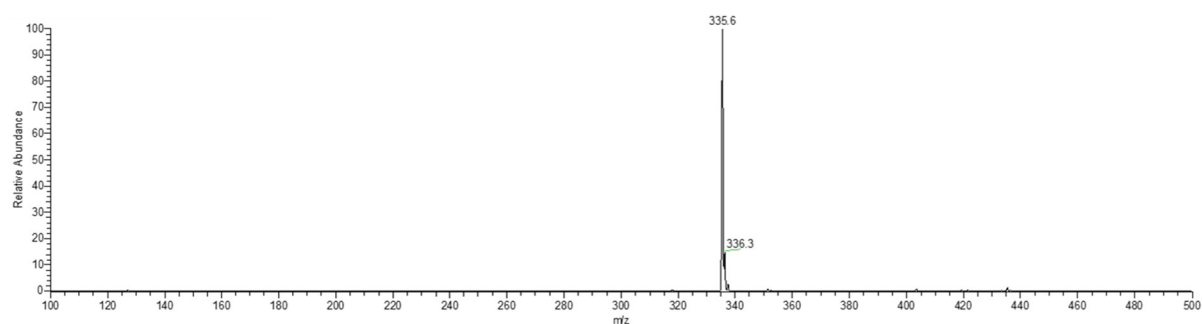

(c)

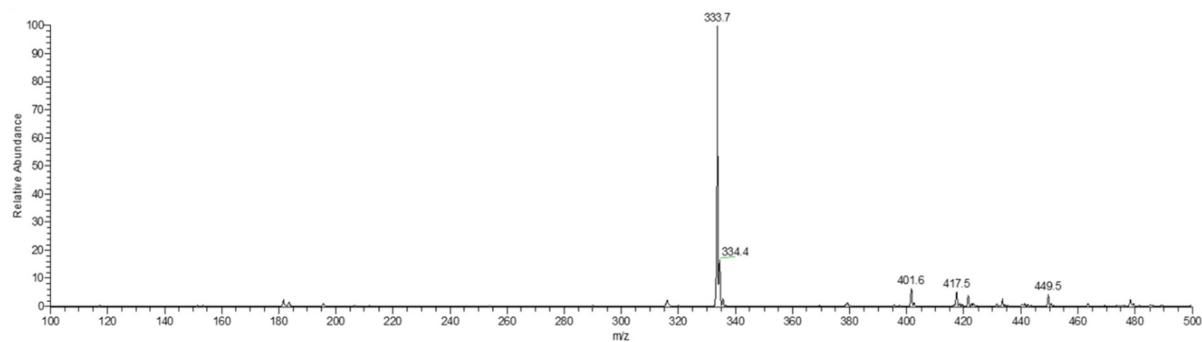

**Figure S2.** LC-MS spectra for the products obtained from the conversion of (a) 10*S*-HDHA, (b) 8*S*-HETE, and (c) 8*S*-HEPE by BT 15SLOX.

(a)

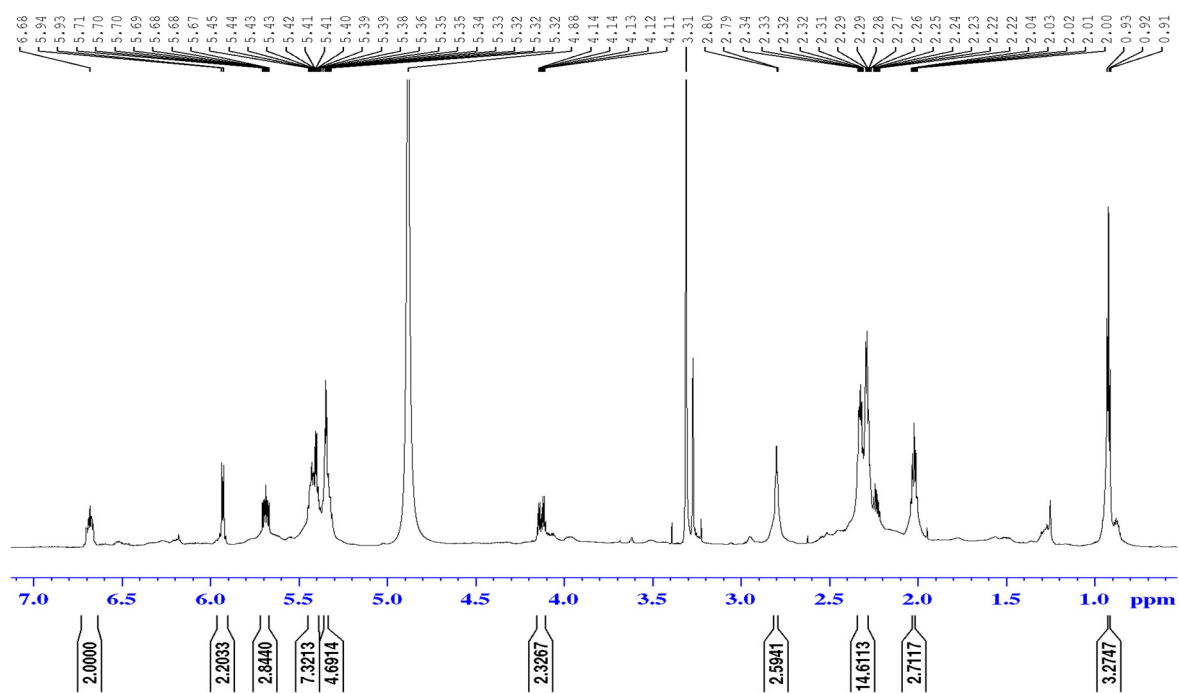

(b)

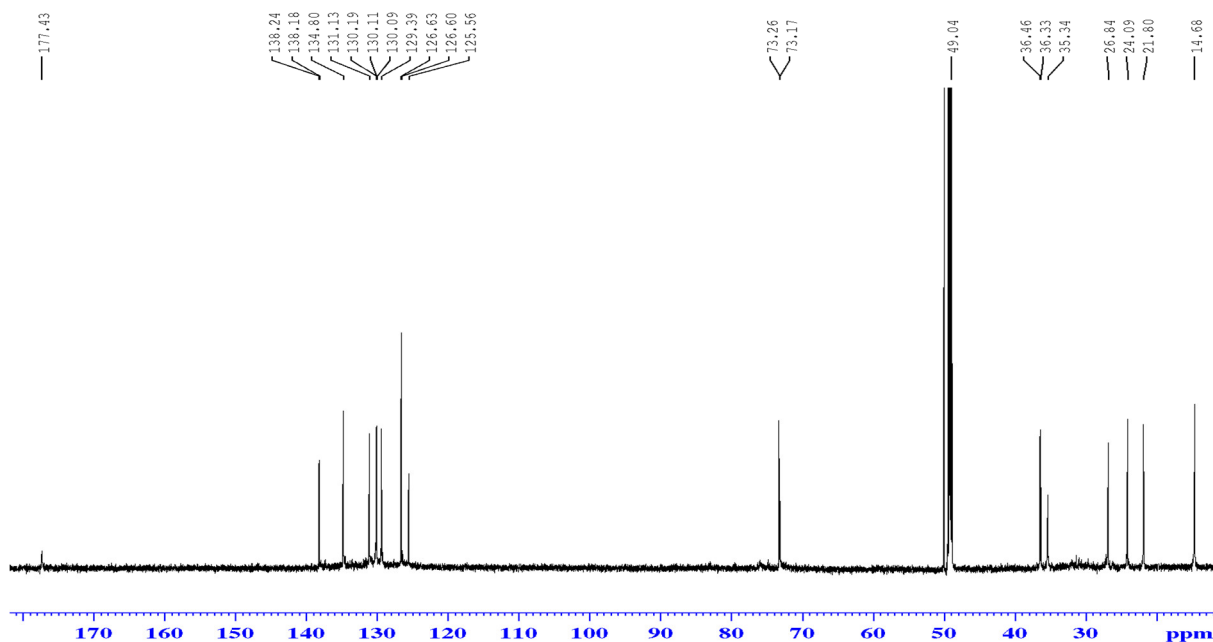

(c)

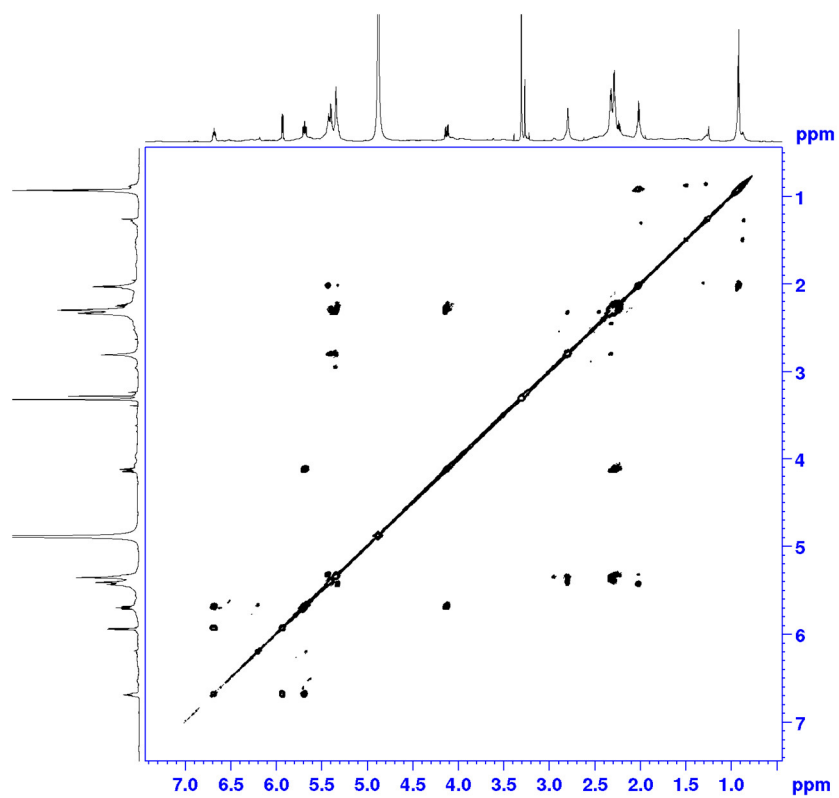

(d)

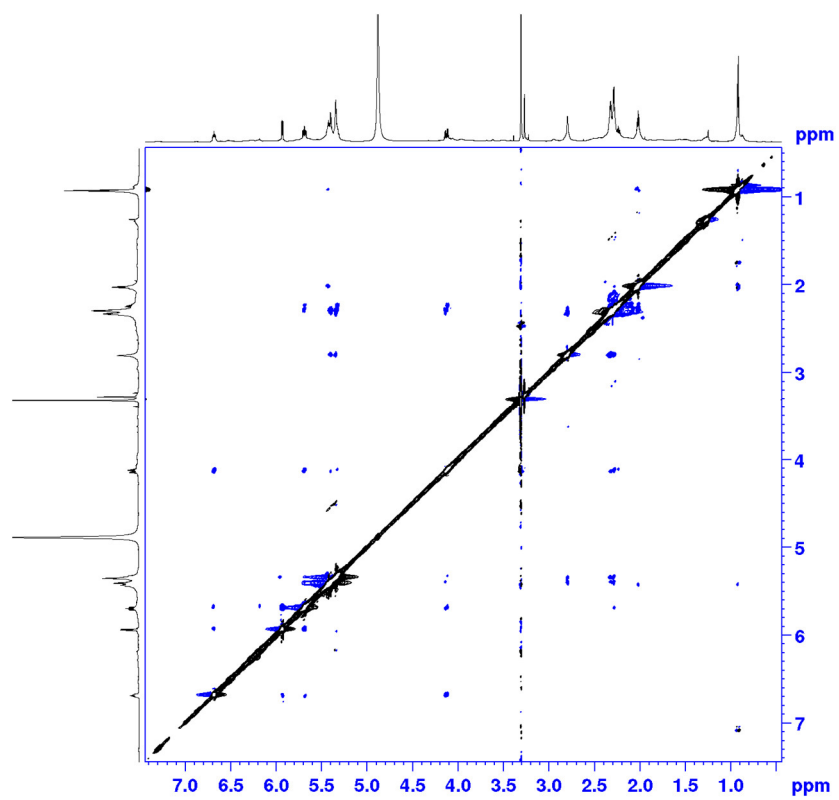

(e)

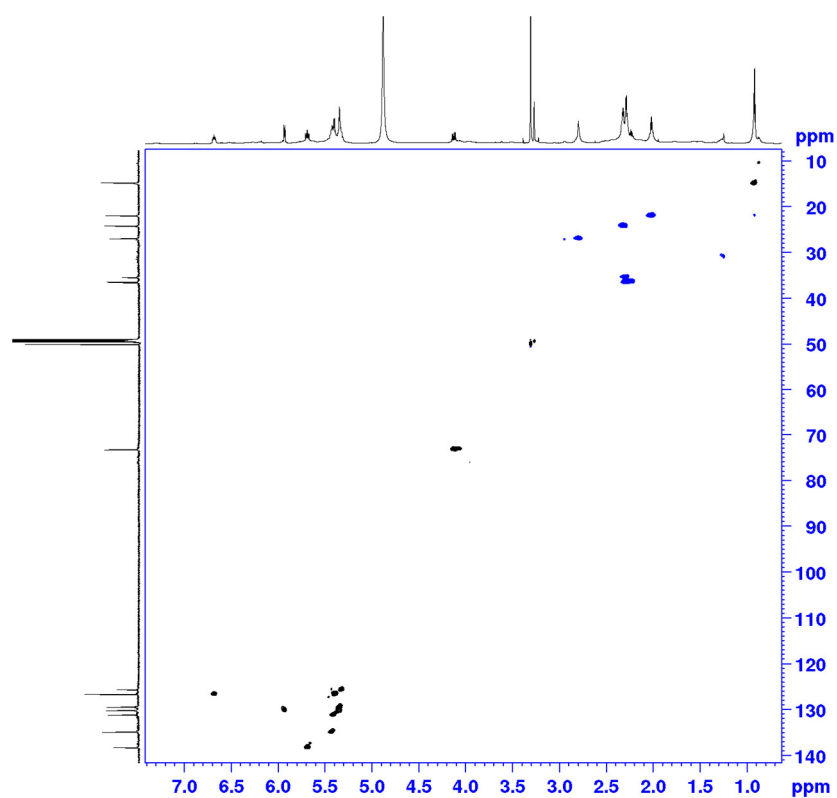

(f)

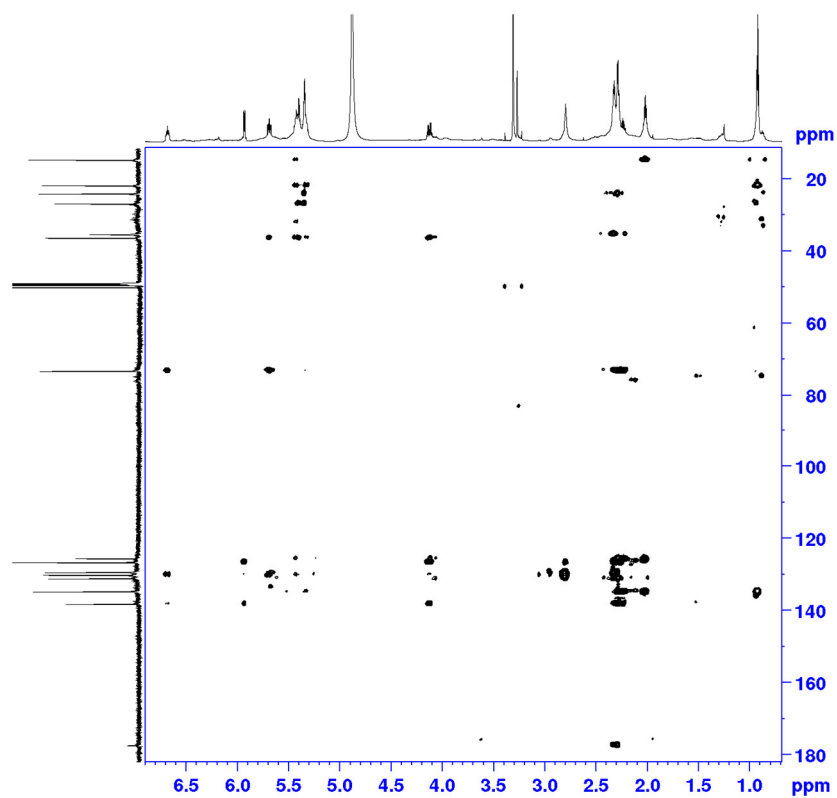



**Figure S3.** 1D ( $^1\text{H}$  and  $^{13}\text{C}$ ) and 2D (COSY, ROSEY, HSQC, and HMBC) NMR spectra of 10*S*,17*S*-DiHDHA (PDX) using NMR spectroscopy (850 MHz NMR, MeDO). (a)  $^1\text{H}$  NMR spectrum of PDX. (b)  $^{13}\text{C}$  NMR spectrum of PDX. (c) COSY spectrum of PDX. (d) ROSEY spectrum of PDX. (e) HSQC spectrum of PDX. (f) HMBC spectrum of PDX.

(a)

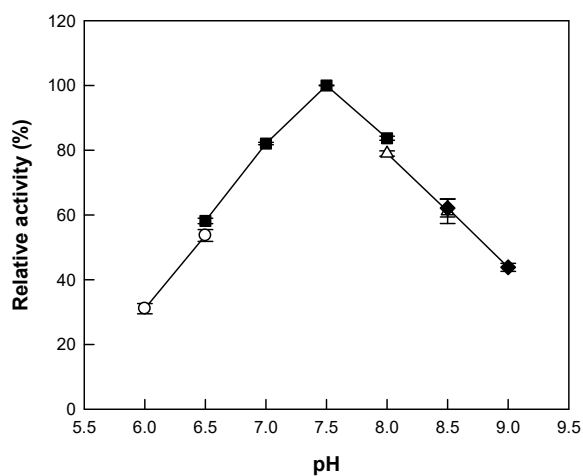

(b)

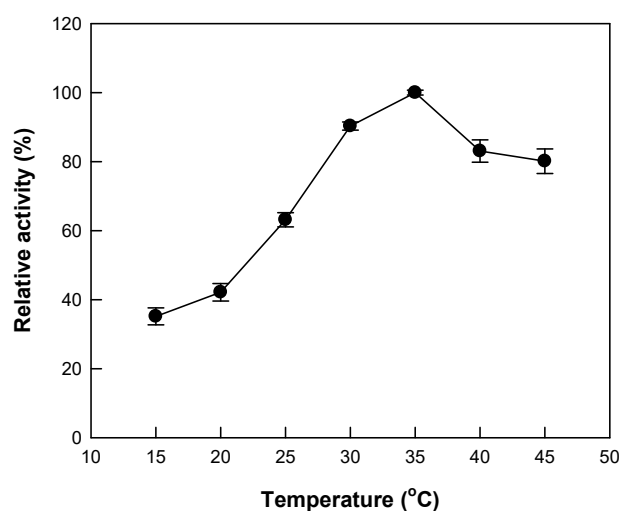

**Figure S4.** Effects of pH and temperature on the production of 10S-HDHA from DHA in DFOH using *E. coli* cells expressing MO 8SLOX. (a) Effect of pH. The reactions were performed in 50 mM MES (pH 6.0–6.5, ○), HEPES (pH 6.5–8.0, ■), EPPS (pH 8.0–8.5, △), and CHES (pH 8.5–9.0, ◆) buffers with 1 g/L of *E. coli* cells expressing MO 8SLOX and DFOH containing 1 mM DHA at 35 °C for 10 min. (b) Effect of temperature. The reactions were performed in 50 mM HEPES buffer (pH 7.5) with 1 g/L of *E. coli* cells expressing MO 8SLOX and DFOH containing 1 mM DHA by varying the temperature from 15 to 45 °C for 10 min. Data represent the means of three separate experiments, and error bars represent the standard deviation.

(a)

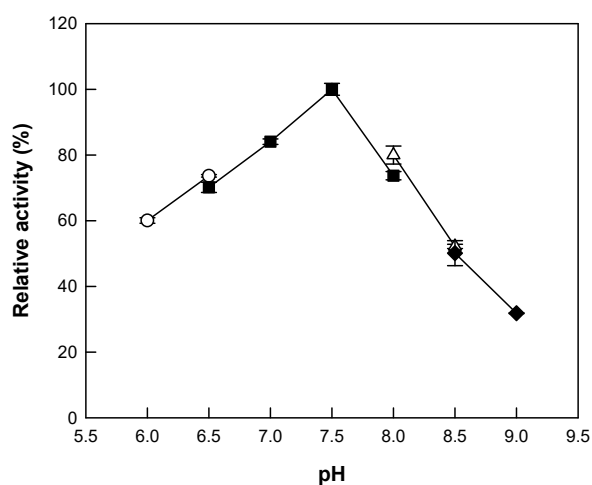

(b)

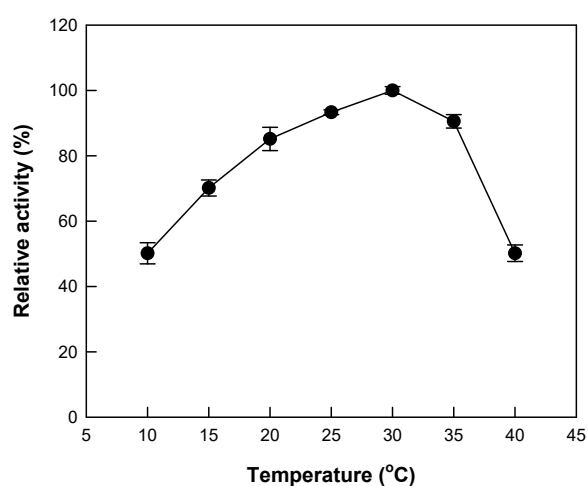

**Figure S5.** Effects of pH and temperature on the production of PDX from 10S-HDHA in 8SLOX-treated DFOH using *E. coli* cells expressing BT 15SLOX. (a) Effect of pH. The reactions were performed in 50 mM MES (pH 6.0–6.5, ○), HEPES (pH 6.5–8.0, ■), EPPS (pH 8.0–8.5, △), and CHES (pH 8.5–9.0, ◆) buffers with 1 g/L cells expressing BT 15SLOX and 8SLOX-treated DFOH containing 0.43 mM 10S-HDHA at 35 °C for 10 min. (b) Effect of temperature. The reactions were performed in 50 mM HEPES buffer (pH 7.5) with 1 g/L of *E. coli* cells expressing BT 15SLOX and 8SLOX-treated DFOH containing 0.43 mM 10S-HDHA by varying the temperature from 10 to 40 °C for 10 min. Data represent the means of three separate experiments, and error bars represent the standard deviation.
